# Supplementary material for: Optimizing the electronic synergy of atomically dispersed dual-metal sites for high-efficiency oxygen evolution/reduction reaction
Source: Royal Society of Chemistry journal article supplement (doi:10.1039/d4cc05706f), 2025-01-01
Supplement: d4cc05706f1.pdf [file d4cc05706f1.pdf]

## **Supporting Information**

**Optimizing electronic synergy of atomically dispersed dual-metal sites for high-efficiency Oxygen Evolution/Reduction Reaction**

*Yue Wang, Xueting Feng, Ziang Shang, Xintong Li, Chao Ma, Guanzhen Chen,  
Ying Zhao, Shaoheng Wu\* , and Yunhu Han\**

## 1. Methods

**Chemicals and reagents.** Zinc nitrate hexahydrate ( $\text{Zn}(\text{NO}_3)_2 \cdot 6\text{H}_2\text{O}$ , 99%), nickel nitrate hexahydrate ( $\text{Ni}(\text{NO}_3)_2 \cdot 6\text{H}_2\text{O}$ , 99%), methanol and iron acetylacetonate ( $\text{Fe}(\text{acac})_3$ , 98%), 2-methylimidazole (2-MeIM, 98%) and  $\text{RuO}_2$  were purchased from Adamas. Zinc acetate dihydrate ( $\text{Zn}(\text{CH}_3\text{COO})_2$ , 99%), anhydrous ethanol, and potassium hydroxide (KOH) were purchased from Greagent. All reagents were used as received and did not need to be further purified. 20% Pt/C was purchased from Johnson Matthey, UK.

**Preparation of Fe/ZIF-8 precursors.** Firstly, 5.6 mmol of  $\text{Zn}(\text{NO}_3)_2 \cdot 6\text{H}_2\text{O}$  and 22.5 mmol of 2-MeIM were dissolved in 45 mL of methanol, and sonicated for 10 min. Then 0.5 mmol of  $\text{Fe}(\text{acac})_3$  was dispersed in the above 2-MeIM methanol solution and stirred for 30 min. The two solutions were then mixed and stirred for about 10 min. The liquid became turbid and changed from blood-red to orange-red, indicating the start of Fe/ZIF-8 production. The reaction was further carried out at room temperature for 12 h, centrifuged, washed with anhydrous ethanol, and finally dried under vacuum at 65 °C for 8 h.

**Preparation of Fe/CN and CN.** Appropriate amount of the above synthesized Fe/ZIF-8 precursor powder was placed in a ceramic boat, which was put into a tube furnace and heated to 900 °C at a heating rate of 5 °C  $\text{min}^{-1}$  in a flowing Ar atmosphere for 2 h. The sample was then naturally cooled to room temperature and collected. After cooling to room temperature, the sample was collected and the Fe/CN sample was prepared for further use. Appropriate amount of the above synthesized ZIF-8 precursor powder was placed in a ceramic boat and calcined in a tube furnace under the same conditions as the Fe/CN sample to obtain the CN sample for further use.

**Preparation of Ni@Fe/CN and Ni@CN.** Take 40 mg of the above prepared Fe/CN sample in a small beaker, add 0.2 mmol of  $\text{Ni}(\text{NO}_3)_2 \cdot 6\text{H}_2\text{O}$  powder, and then add 30 mL of deionized water to disperse and dissolve the drug. The above mixture was sonicated for more than 60 min to make the Fe/CN sample well dispersed and  $\text{Ni}(\text{NO}_3)_2 \cdot 6\text{H}_2\text{O}$  fully dissolved in deionized water. The reaction was further impregnated by stirring for 12 h at room temperature. The sample was centrifuged,

washed with anhydrous ethanol and deionized water, and finally dried under vacuum at 65°C for 8 h. The Ni@CN sample was prepared similarly to the Ni@Fe/CN sample, except that the precursor 40 mg of Fe/CN was replaced by 40 mg of CN, and then impregnated with nickel nitrate in aqueous solution, centrifuged, washed, and dried to obtain the Ni@CN sample for further use.

***Preparation of FeNi-CN, Fe-CN and Ni-CN electrocatalysts.*** An appropriate amount of the above synthesized Ni@Fe/CN powder sample was placed in a ceramic boat, which was placed in a tube furnace and heated to 500°C at a heating rate of 5°C min<sup>-1</sup> in the atmosphere of a flowing NH<sub>3</sub>/Ar mixture, and kept for 100 min for calcination. After the samples cooled to room temperature, the samples were acid washed to neutrality, the sample was collected and labeled as FeNi-CN. Appropriate amounts of the above synthesized Fe/CN and Ni@CN powder samples were placed in a ceramic boat and calcined in a tube furnace under the same conditions as those of the FeNi-CN electrocatalysts, and the samples were labeled as Fe-CN and Ni-CN.

***Quasi-solid-state Zn-air battery assembly.*** In a conventional setup for the solid-state Zn-air battery, a polished zinc foil measuring 2 × 2 cm<sup>2</sup> (with an additional 2 × 2 cm<sup>2</sup> left blank for current collection) was utilized as the anode. Catalysts coated on carbon cloth measuring 2 × 2 cm<sup>2</sup> (with an additional 2 × 2 cm<sup>2</sup> left blank for current collection) were pressed onto the top of a gel polymer to serve as the cathode. Subsequently, two pieces of white breathable tape were employed to seal the device. Regarding the preparation of the catalyst inks, a mixture was created by blending 10 mg of the FeNi-CN catalyst with 985 μL of ethanol and 15 μL of Nafion solution (5 wt.%) through sonication for 30 minutes. In contrast, for the commercial precious metal catalysts (Pt/C: RuO<sub>2</sub> = 1:1, molar ratio), 5 mg of the catalyst and 15 μL of 5 wt.% Nafion solution were dispersed in 985 μL of ethanol using sonication for 30 minutes. The mass loading of the catalysts was determined to be 2.50 mg cm<sup>-2</sup> for the FeNi-CN-based battery and 1.25 mg cm<sup>-2</sup> for the Pt/C+RuO<sub>2</sub>-based battery. The gel polymer electrolyte was prepared as follows, 4 g of polyvinyl alcohol powder was dissolved in 40 mL of deionized water at 95°C with stirring until a homogeneous and transparent solution was achieved. Subsequently, 4 mL of 18 M KOH was added dropwise over 40 minutes at

95°C with continuous stirring. The solution was then poured into a mold and frozen in a freezer at -20 °C for 2 hours followed by 0°C for 4 hours.

**Liquid Zn-air battery assembly.** A homemade, uncomplicated alkaline/neutral liquid Zn-air battery configuration was assembled, employing carbon paper coated with the FeNi-CN catalyst as the air cathode, Zn foil as the anode (the thickness is 0.05 mm), 6 M KOH and 0.2 M Zn(CH<sub>3</sub>COO)<sub>2</sub> as the alkaline electrolyte. The interface area between the catalyst and the electrolyte on the carbon paper was measured at 1 cm<sup>2</sup>, with a mass loading of the FeNi-CN catalyst on the carbon paper estimated at approximately 2 mg cm<sup>-2</sup>. Additionally, a control sample was prepared by mixing Pt/C and RuO<sub>2</sub> at a molar ratio of 1:1. The specific capacity of the battery can be calculated using the equation:

$$\text{Specific Capacity} = [\text{Discharge Current (mA)} \times \text{Time (h)}] / \text{Weight of consumed Zn (g)}$$

$$\text{Energy Density} = \{[\text{Current (mA)} \times \text{Time (h)}] / \text{Weight of consumed Zn (kg)}\} \times \text{Discharge}$$

## 2. Structural characterizations

Scanning electron microscopy (SEM) was performed on a Hitachi S4800 electron microscope with an accelerating voltage of 30 kV. Transmission electron microscopy (TEM) was performed on a Hitachi H-800 microscope. The prepared catalysts were characterized by high resolution transmission electron microscopy (HR-TEM) as well as high angle annular dark field energy dispersive spectroscopy (HAADF-EDS, JEOL-2100FFETEM, operating voltage 200 kV). Powder X-ray diffractometry (PXRD) experiments were performed using a Rigaku RU-200b X-ray powder diffractometer with Cu K $\alpha$  rays ( $\lambda = 1.5406 \text{ \AA}$ ), 2° min<sup>-1</sup>. Raman spectra were collected on a Horiba JOBIN YVON US/HR800 UV-type high-performance micro-Raman spectrometer system with a laser wavelength of 632.8 nm. X-ray photoelectron spectroscopy (XPS) analysis was performed using a ULVAC PHI Quantera microscope analyzer.

## 3. Electrochemical measurements

Scan rate of 50 mV/s with a suitable potential range, and LSV plots were recorded at a scan rate of 10 mV/s with a suitable potential range. Tafel plots were obtained from the transformation of LSV test curves, and the kinetic current densities and Koutecky-Levich (K-L) plots were obtained on the basis of the following equations:

$$\frac{1}{J} = \frac{1}{J_k} + \frac{1}{J_L} = \frac{1}{Bw^{1/2}} + \frac{1}{J_k}$$

$$B = 0.62nFC_0D_0^{2/3}V^{-1/6}$$

where  $J$  is the test current,  $J_k$  and  $J_L$  are the kinetic and limiting currents,  $w$  is the angular velocity of the disk,  $n$  is the number of electron transfers,  $F$  is the Faraday's constant (96485 C mol<sup>-1</sup>),  $C_0$  is the volumetric concentration of O<sub>2</sub> (1.2 × 10<sup>-6</sup> mol cm<sup>-3</sup>), and  $D_0$  is the kinematic viscosity of the electrolyte (0.01 cm<sup>2</sup> s<sup>-1</sup>).

Then, the transferred electron number ( $n$ ) was calculated with the following equation:

$$n = 4 \times I_d / (I_d + I_r / N_c)$$

and H<sub>2</sub>O<sub>2</sub> yield was calculated with the formular of

$$H_2O_2\% = 200 I_r / N_c / (I_d + I_r / N_c)\%$$

where  $I_d$ ,  $I_r$  and  $N_c$  are the disk current, ring current and the collection efficiency of the ring disk electrode (0.424), respectively.

#### 4. Supplementary Figures

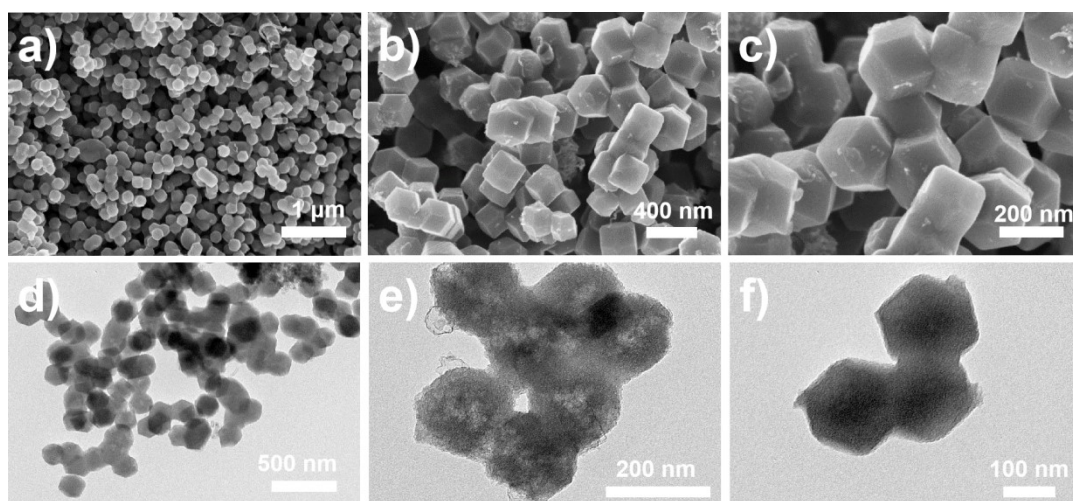

**Figure S1.** (a-c) SEM images, and (d-f) TEM images of the Fe-CN catalyst.

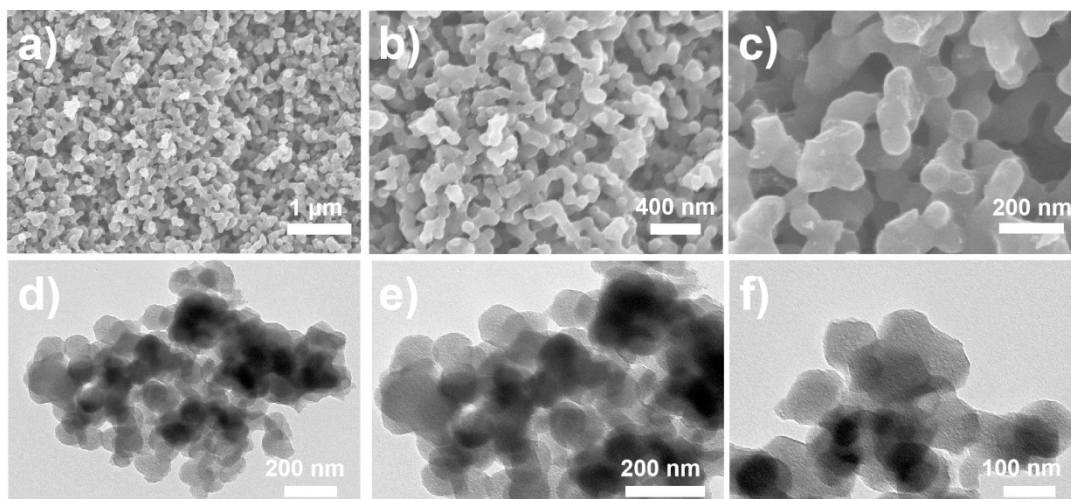

**Figure S2.** (a-c) SEM images, and (d-f) TEM images of the Ni-CN catalyst.

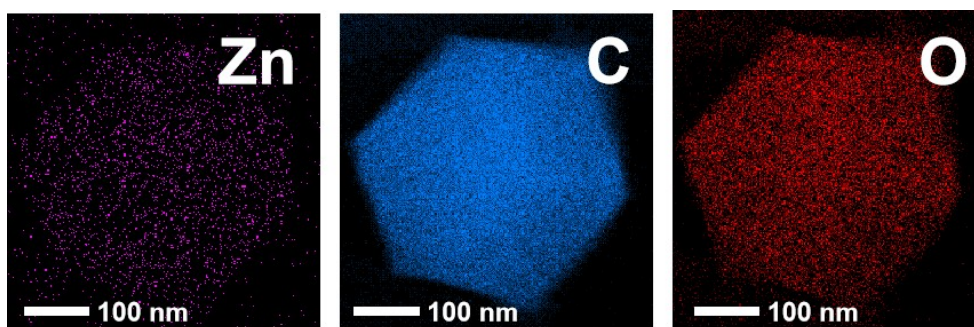

**Figure S3.** Corresponding EDS elemental maps of Zn, C and O in FeNi-CN catalysts.



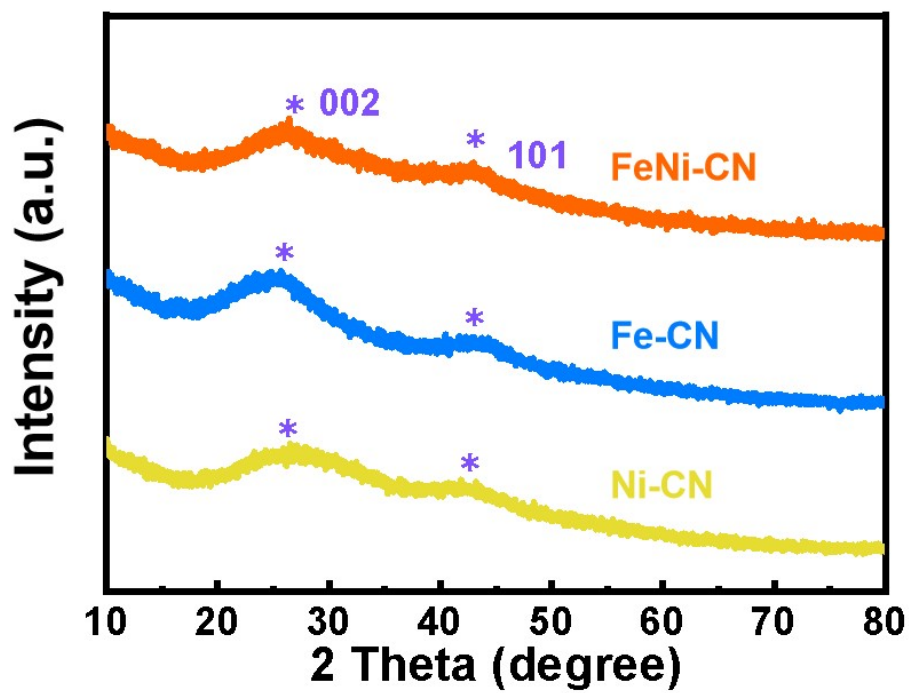

**Figure S4.** PXRD patterns of the FeNi-CN, Fe-CN and Ni-CN catalysts.

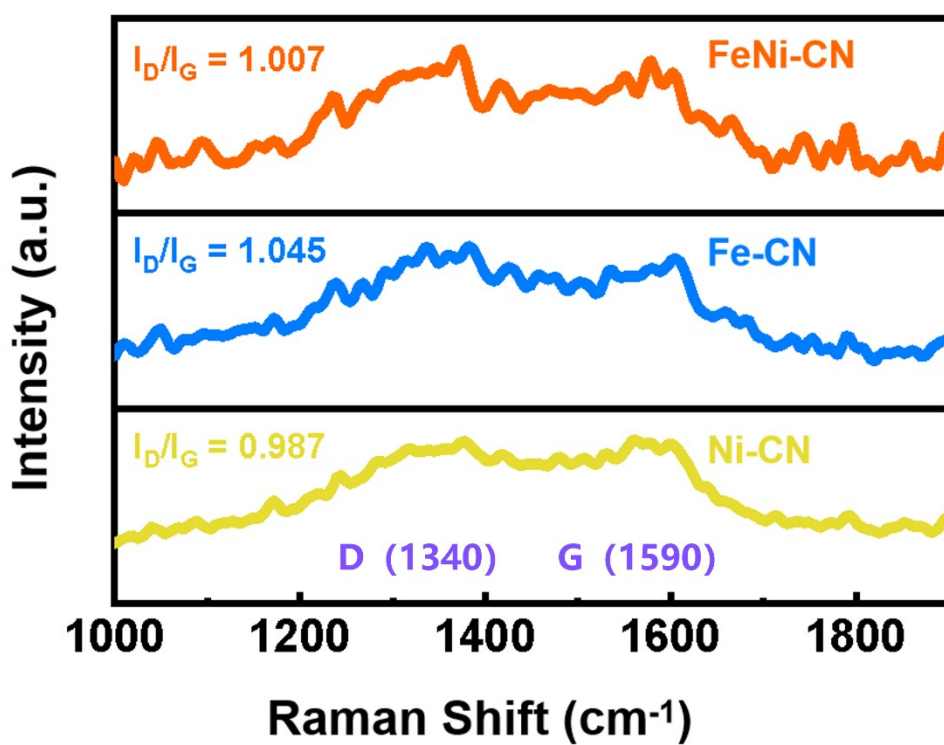

Figure S5. Raman spectra of FeNi-CN, Fe-CN and Ni-CN catalysts.

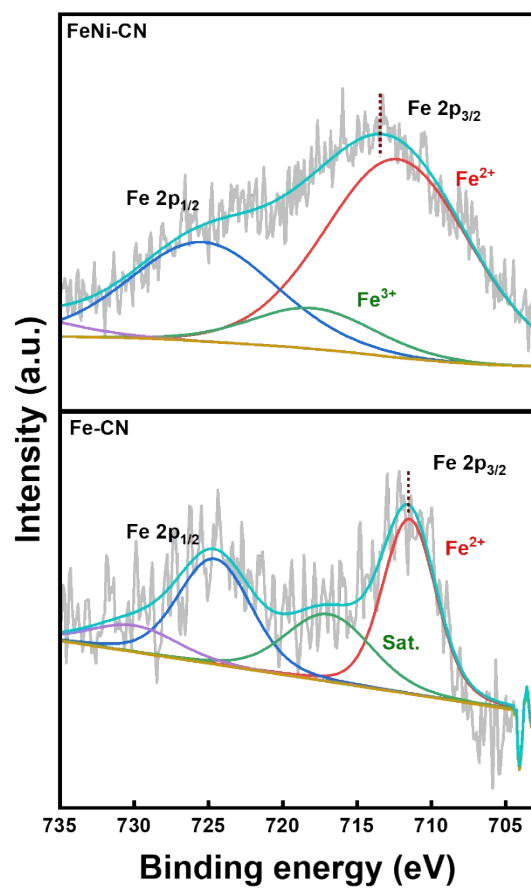

**Figure S6.** Fe 2p spectra of FeNi-CN and Fe-CN catalysts.

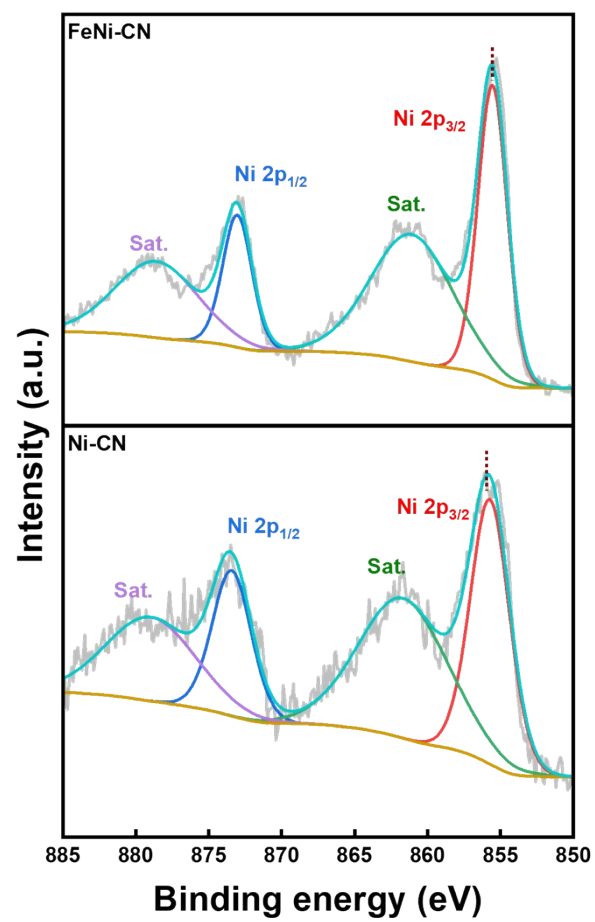

**Figure S7.** Ni 2p spectra of FeNi-CN and Ni-CN catalysts.

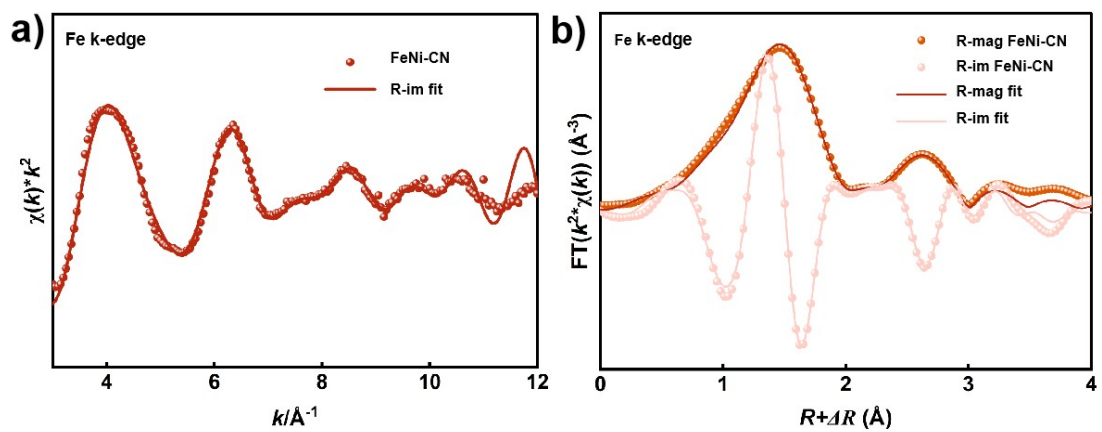

**Figure S8.** EXAFS fitting curves of Fe K-edge at  $k$  space for the FeNi-CN catalyst.

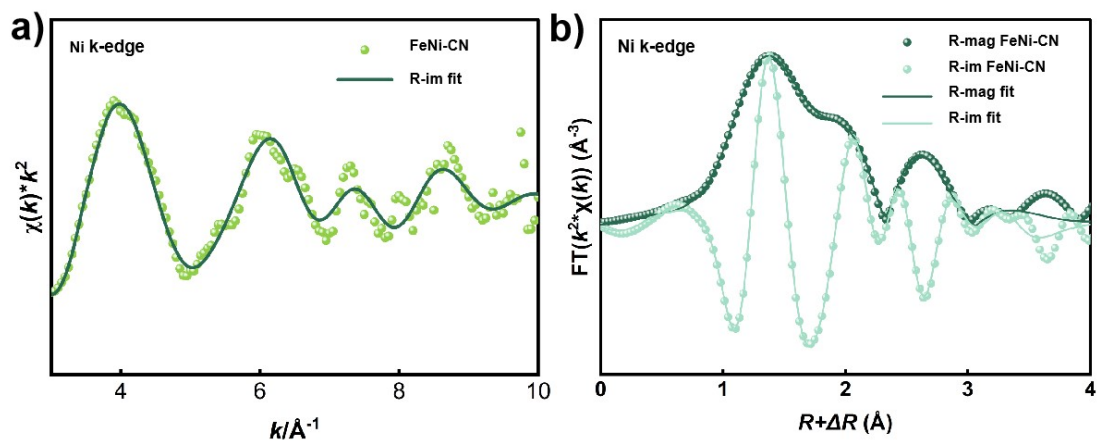

**Figure S9.** EXAFS fitting curves of Ni K-edge at  $k$  space for the FeNi-CN catalyst.

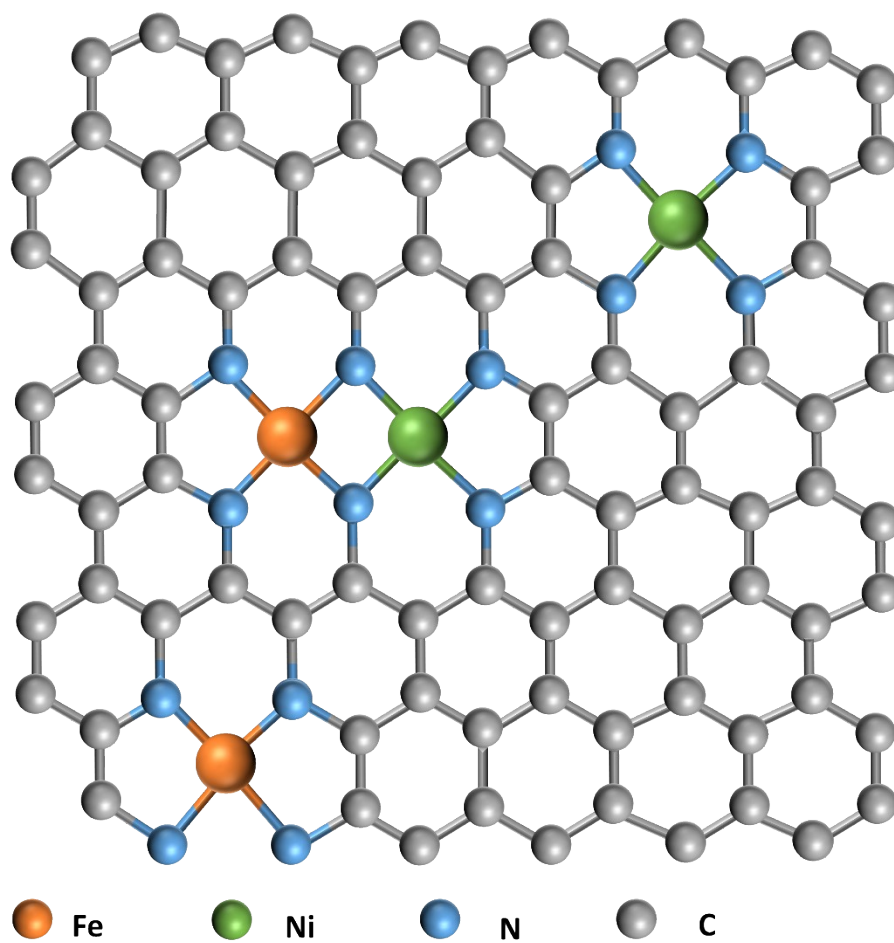

**Figure S10.** Schematic representation of the atomic structure of the FeNi site.

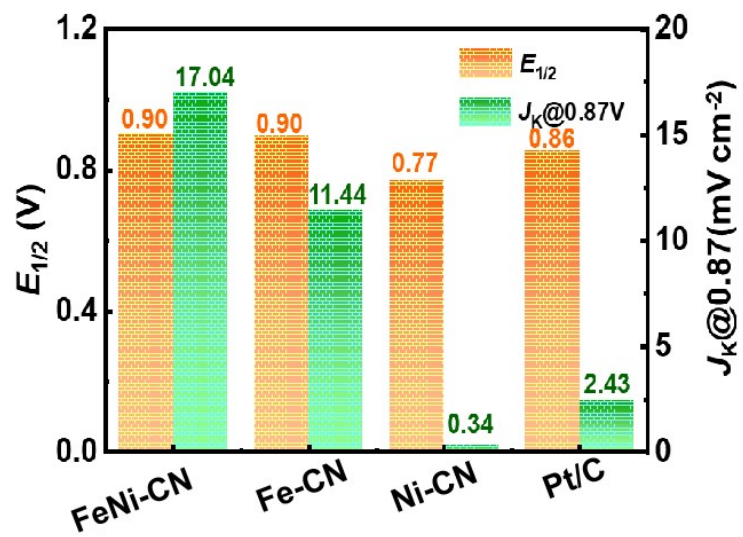

Figure S11. Comparison of  $E_{1/2}$  and  $J_K@0.87V$ .



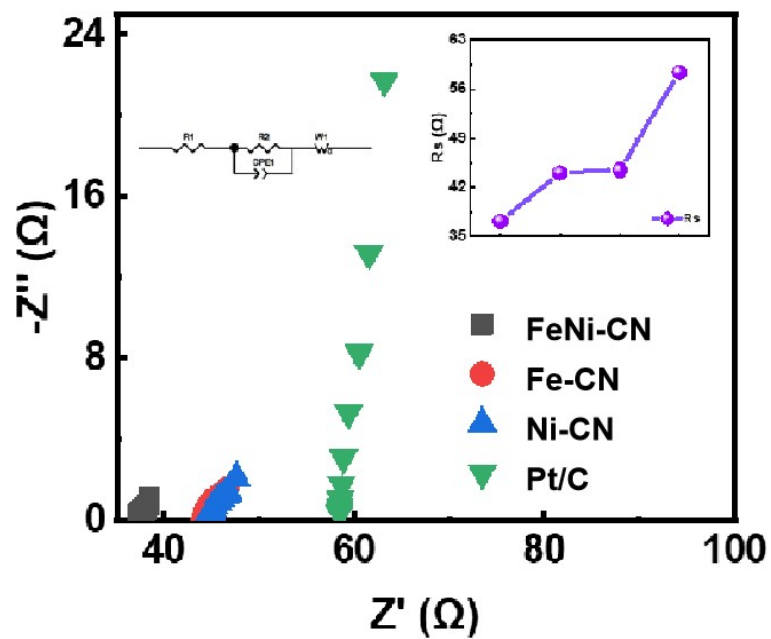

**Figure S12.** Nyquist plots (insert: Ohm resistance and Circuit model) of the FeNi-CN, Fe-CN, Ni-CN and commercial Pt/C catalysts in  $O_2$ -saturated 0.1 M KOH media at 1600 rpm.

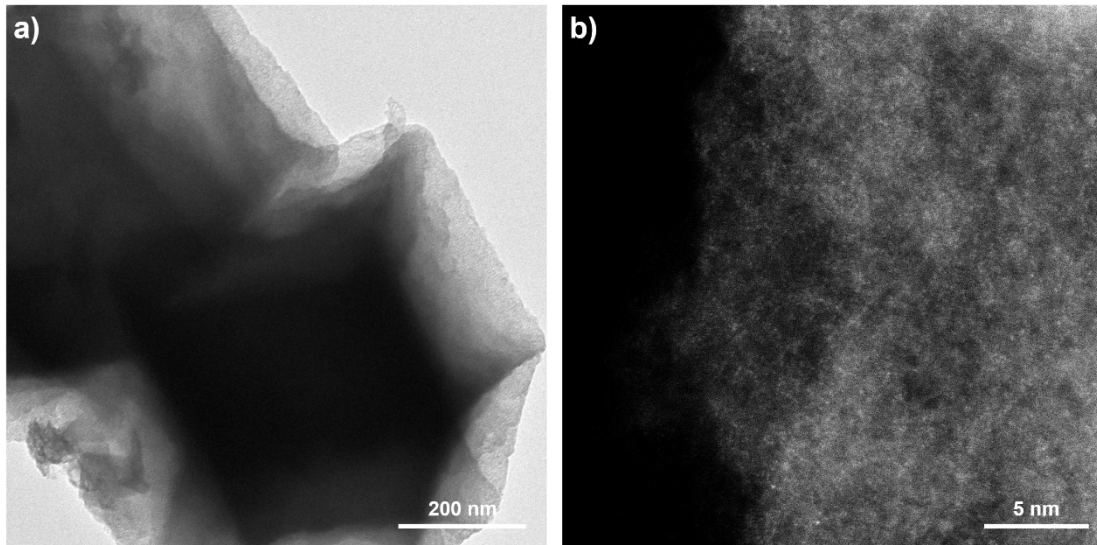

**Figure S13.** a) TEM image and b) HAADF-STEM image of FeNi-CN.

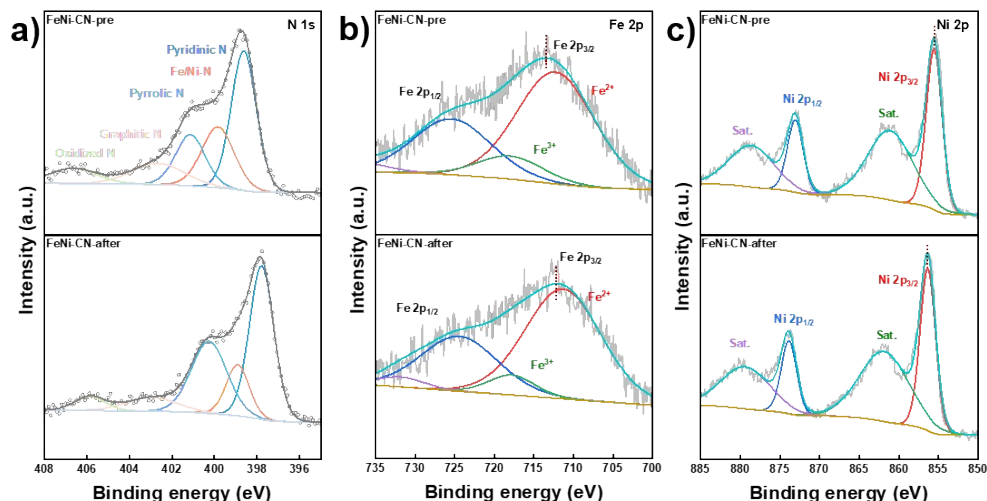

**Figure S14.** XPS spectra of a) N 1s, b) Fe 2p, and c) Ni 2p for the FeNi-CN before and after stability test. The high-resolution N1s spectra of the catalysts after stability test can be deconvoluted to pyridinic N (397.8 eV), M-N<sub>x</sub> (398.9 eV), pyrrolic N (400.2 eV), graphitic N (402.9 eV) and oxidized N (405.8 eV). And the proportion of M-N<sub>x</sub> drops from 22.39% to 13.64% after stability test. In the spectra of FeNi-CN after stability test, the Fe and Ni peaks are shifted to lower and higher binding energies, respectively, compared to FeNi-CN.

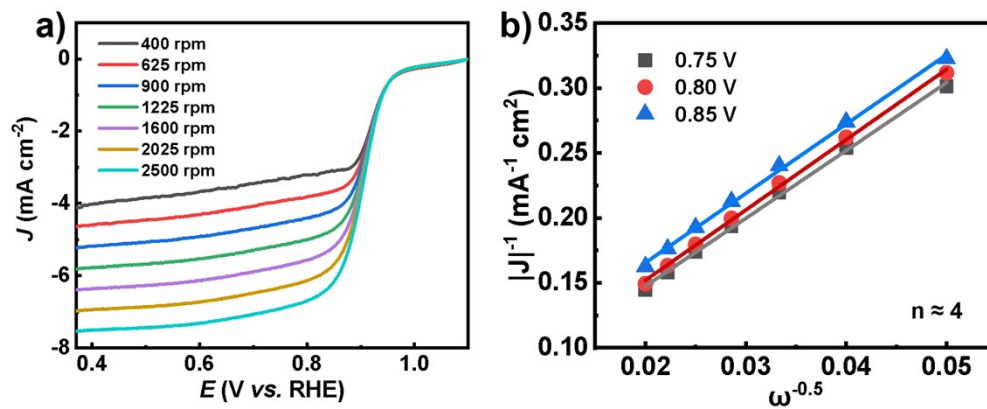

**Figure S15.** (a) LSV curves at different rotating rates, and (b) Koutecky-Levich (K-L) plots of the FeNi-CN catalyst in O<sub>2</sub>-saturated 0.1 M KOH media.

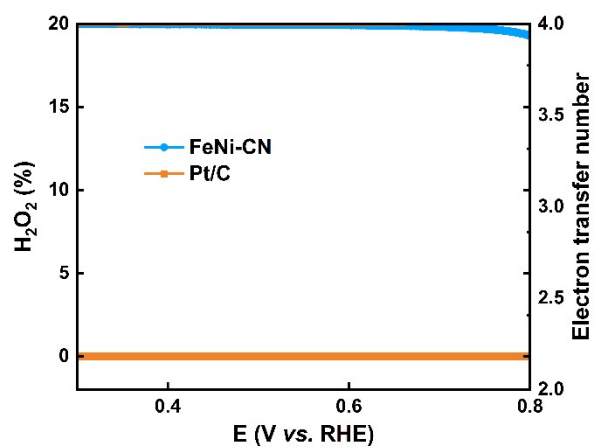

**Figure S16.** Hydrogen peroxide yield and electron transfer number plots of FeNi-CN and commercial Pt/C catalysts in O<sub>2</sub>-saturated 0.1 M KOH solution.

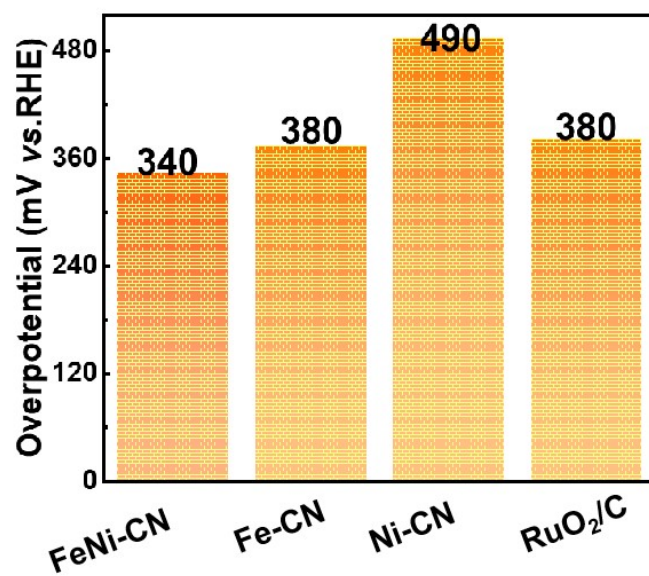

**Figure S17.** Comparison of overpotential @ 10 mA cm<sup>-2</sup>.

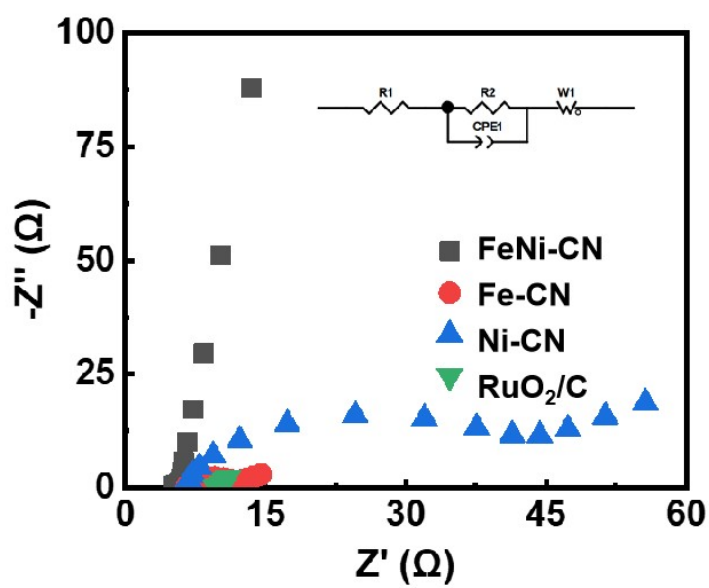

**Figure S18.** Nyquist plots (insert: circuit model) of the FeNi-CN, Fe-CN, Ni-CN and commercial Pt/C catalysts in N<sub>2</sub>-saturated 1 M KOH media at 1600 rpm.

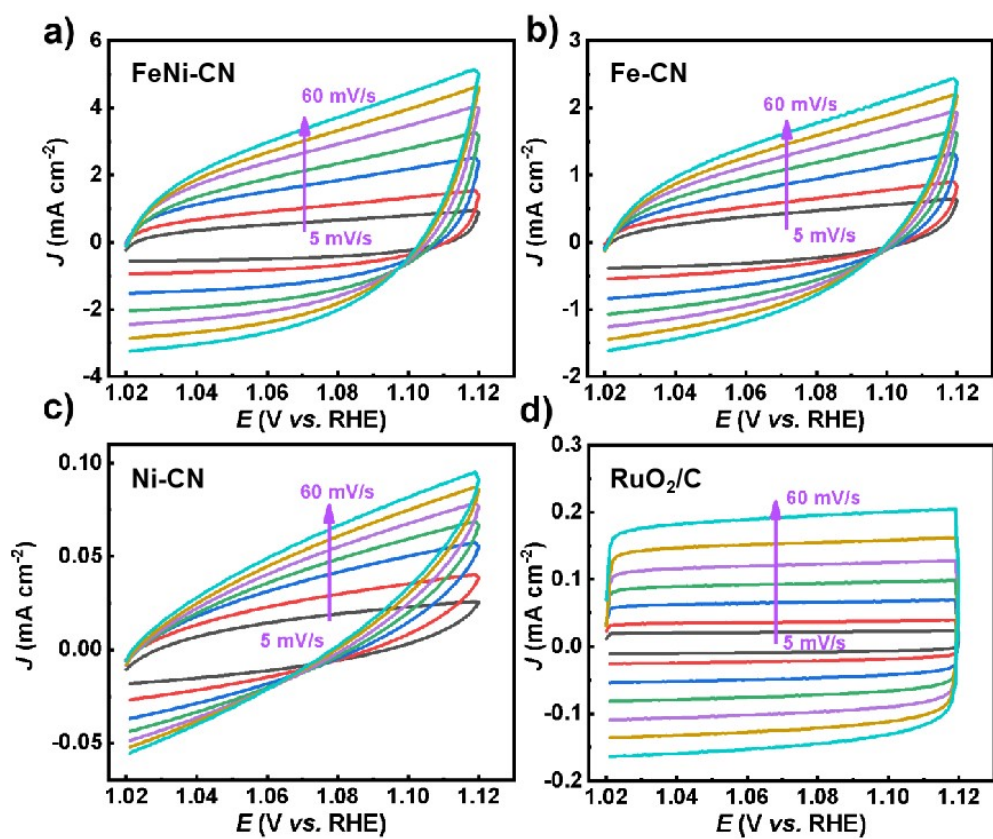

**Figure S19.** CV curves of the (a) FeNi-CN, (b) Fe-CN, (c) Ni-CN, and (d)  $\text{RuO}_2/\text{C}$  catalysts under different scanning speeds.



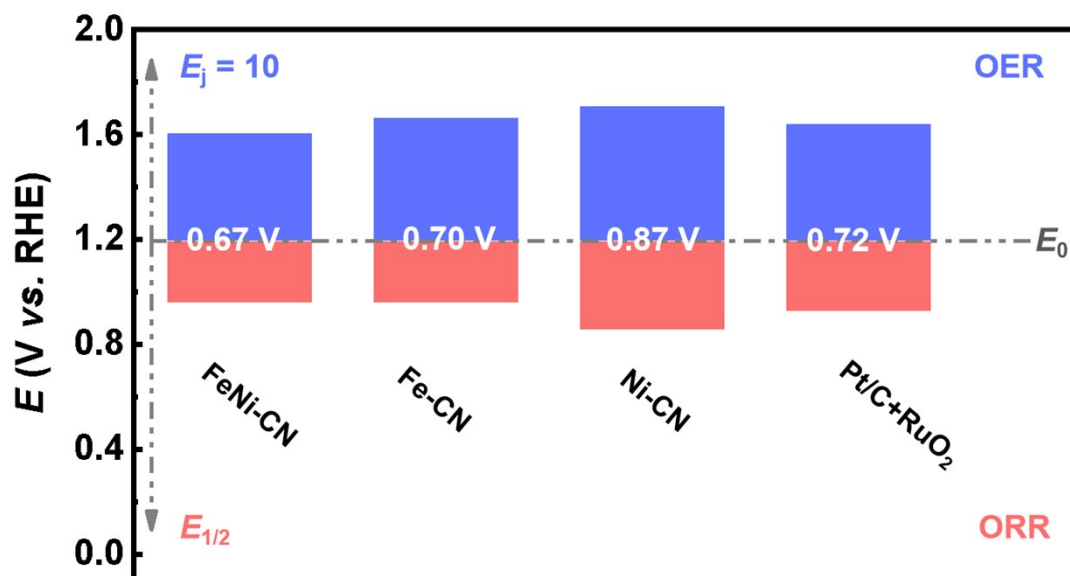

**Figure S20.** Comparison of the  $\Delta E$  of the FeNi-CN, Fe-CN, Ni-CN and RuO<sub>2</sub>/C catalysts.

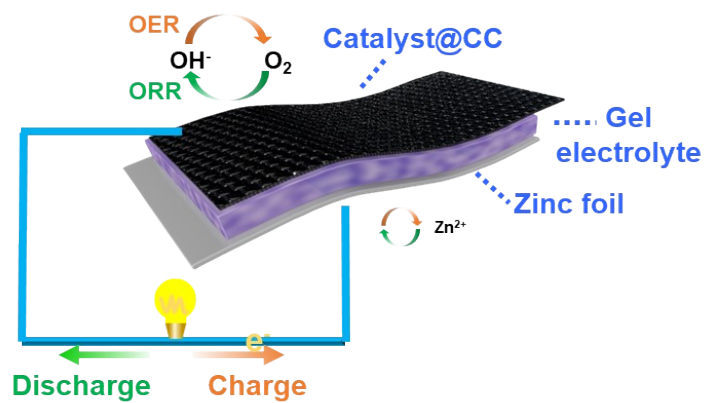

**Figure S21.** Schematic illustration of a homemade flexible quasi-solid-state alkaline ZAB.

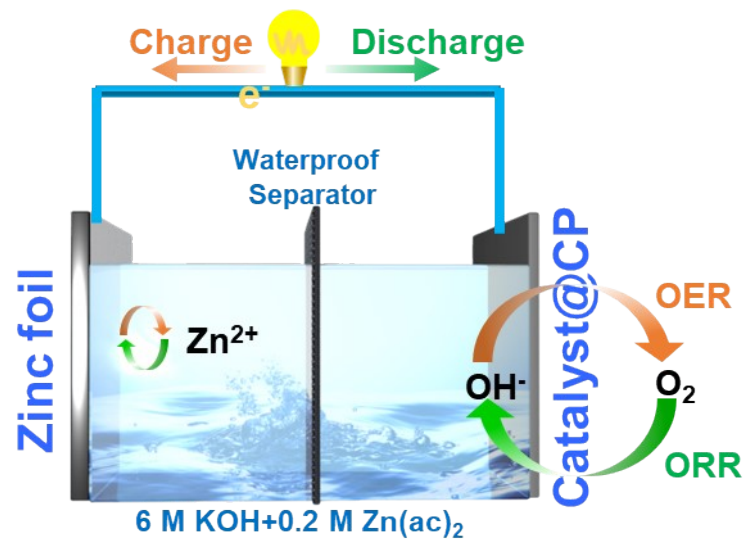

**Figure S22.** Schematic illustration of a homemade liquid alkaline ZAB.

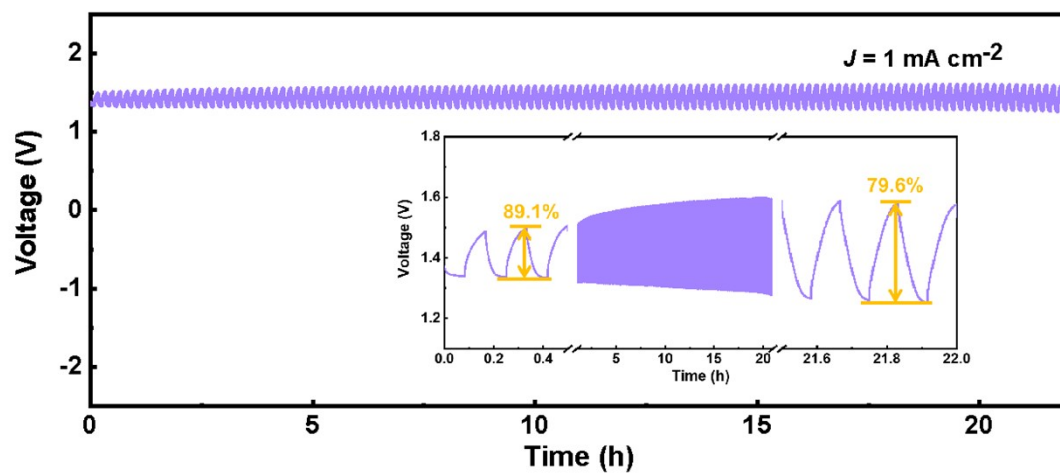

**Figure S23.** Cycling stability test of flexible quasi-solid-state alkaline ZABs with air cathodes of the FeNi-CN catalyst.

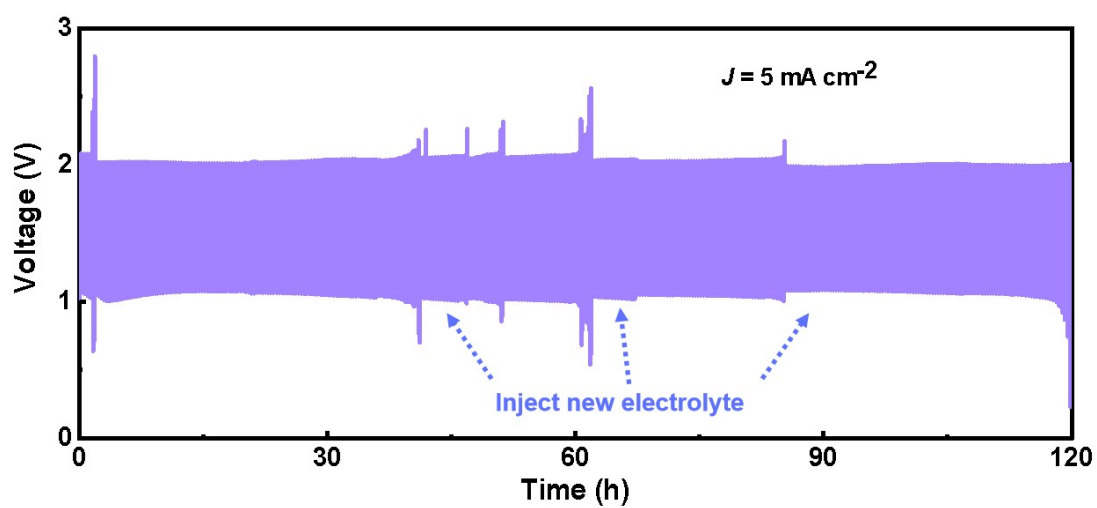

**Figure S24.** Cycling stability test of liquid alkaline ZABs with air cathodes of the FeNi-CN catalyst.

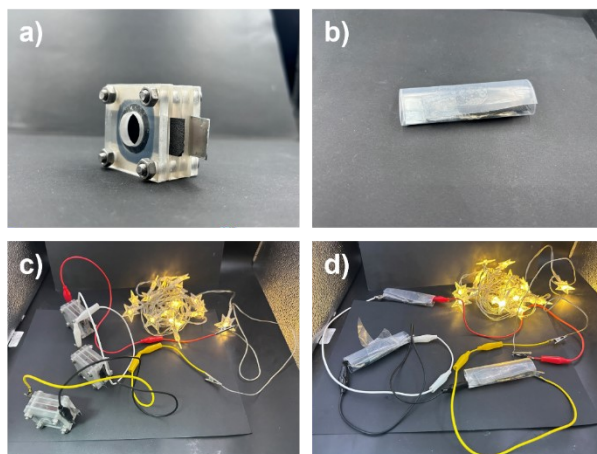

**Figure S25.** a) Photograph of the liquid alkaline ZABs with air cathodes of the FeNi-CN and Pt/C+RuO<sub>2</sub> catalysts. b) Photograph of the flexible quasi-solid-state ZABs with air cathodes of the FeNi-CN and Pt/C+RuO<sub>2</sub> catalysts. LED strip lit by c) the liquid ZABs in alkaline electrolyte and d) flexible quasi-solid-state ZABs.

**Table S1.** Content of metal elements in FeNi-CN catalysts.

| Sample  | Element | Content(wt%) |
|---------|---------|--------------|
| FeNi-CN | Fe      | 0.60         |
|         | Ni      | 1.86         |

**Table S2.** Structural parameters of FeNi-CN extracted from the EXAFS fitting. ( $S_0^2=1.0$ )

| Sample  | Shell   | CN          | R (Å)       | $\sigma^2$ ( $10^{-3}\text{Å}^2$ ) | $\Delta E_0$ (eV) | R-factor |
|---------|---------|-------------|-------------|------------------------------------|-------------------|----------|
| FeNi-CN | Fe-N    | 4.704±0.276 | 1.872±0.113 | 1.08±0.55                          |                   |          |
|         | Fe-N-Ni | 1.575±0.361 | 2.955±0.287 | 0.17±0.36                          | -4.917            | 0.0054   |
|         | Fe-N-Fe | 0.002±0.734 | 2.749±1.034 | 0.03±1.88                          |                   |          |
|         | Ni-N    | 3.266±0.041 | 1.958±0.100 | 0.09±0.08                          |                   |          |
|         | Ni-N-Fe | 1.263±0.991 | 2.973±0.013 | 0.22±0.62                          | -4.115            | 0.0035   |
|         | Ni-N-Ni | 0.005±1.292 | 2.964±0.086 | 0.22±0.08                          |                   |          |

$S_0^2$  is the amplitude reduction factor,

CN is the coordination number,

R is interatomic distance (the bond length between central atoms and surrounding coordination atoms),

$\sigma^2$  is Debye-Waller factor (a measure of thermal and static disorder in absorber-scatterer distances),

$\Delta E_0$  is edge-energy shift (the difference between the zero kinetic energy value of the sample and that of the theoretical model),

R-factor is used to value the goodness of the fitting.



**Table S3.** Summary of the performance of the non-noble metal bifunctional catalysts

| Catalysts                                                              | $E_{1/2}$<br>(V vs. RHE) | Tafel slope<br>(mV dec <sup>-1</sup> ) | Overpotential @<br>$J_{10}$ / mV | Tafel slope<br>(mV dec <sup>-1</sup> ) | $\Delta E$ (V<br>vs.<br>RHE) | Ref       |
|------------------------------------------------------------------------|--------------------------|----------------------------------------|----------------------------------|----------------------------------------|------------------------------|-----------|
| FeNi-CN                                                                | 0.90                     | 40                                     | 340                              | 43                                     | 0.67                         | This work |
| m-Fe <sub>2.04</sub> Ni <sub>0.66</sub> @GCFs                          | 0.81                     | 77.5                                   | 310                              | 74.6                                   | 0.73                         | [1]       |
| FeN <sub>4</sub> B-NiN <sub>4</sub> B                                  | 0.9                      | 61                                     | 388                              | -                                      | 0.718                        | [2]       |
| NPC-950                                                                | 0.88                     | 63.7                                   | 371                              | 63.5                                   | 0.72                         | [3]       |
| NiCo <sub>1.8</sub> Fe <sub>0.2</sub> O <sub>4</sub> @NCF              | 0.86                     | 70                                     | 270                              | 130                                    | 0.64                         | [4]       |
| CoFe-FeNC                                                              | 0.876                    | 80.83                                  | 296                              | 44.76                                  | 0.65                         | [5]       |
| FeCo-N-C-1.25                                                          | 0.853                    | 41.75                                  | 295                              | 61.18                                  | 0.672                        | [6]       |
| Cu-Co/NC                                                               | 0.92                     | 63.6                                   | 335                              | 83.5                                   | 0.645                        | [7]       |
| PtPdFeCoNi/HOPNC                                                       | 0.866                    | 53.9                                   | 310                              | 88.7                                   | 0.674                        | [8]       |
| Co <sub>4</sub> N@d-NCNWs/D                                            | 0.83                     | -                                      | 340                              | 65                                     | 0.74                         | [9]       |
| LDH A-Fe <sub>SA</sub> Co <sub>SA</sub> -FeCo <sub>Alloy</sub> -CNT/NC | 0.84                     | 89                                     | 330                              | 125.5                                  | 0.72                         | [10]      |
| Fe/I-N-CR                                                              | 0.915                    | 52.9                                   | 329                              | 1.559                                  | 0.64                         | [11]      |
| FeOCo SAD                                                              | 0.87                     | 117                                    | 310                              | 1.654                                  | 0.67                         | [12]      |

#### 4. References

1. K. Ding, J. Hu, L. Zhao, W. Jin, H. Yu, Y. Liu, Z. Wu, S. Cai, Y. Yang, G. Zou, H. Hou, X. Ji, *Nano Energy*, 2024, **121**, 109270.
2. Z. Wang, R. Xu, Q. Ye, X. Jin, Z. Lu, Z. Yang, Y. Wang, T. Yan, Y. Liu, Z. Pan, S. J. Hwang, H. J. Fan, *Adv. Funct. Mater.*, 2024, **34**, 2315376.
3. Z. Li, S. Ji, H. Liu, C. Xu, C. Guo, X. Lu, H. Sun, S. Dou, S. Xin, J. H. Horton, C. He, *Adv. Funct. Mater.*, 2024, **34**, 2314444.
4. Y. Liu, L. Zhou, S. Liu, S. Li, J. Zhou, X. Li, X. Chen, K. Sun, B. Li, J. Jiang, H. Pang, *Angew. Chem., Int. Ed.*, 2024, **63**, e202319983.
5. S. Zhang, J. Yang, L. Yang, T. Yang, Y. Liu, L. Zhou, Z. Xu, X. Zhou, J. Tang, *Appl. Catal., B*, 2024, **359**, 124485.
6. H. Liu, J. Huang, K. Feng, R. Xiong, S. Ma, R. Wang, Q. Fu, M. Rafique, Z. Liu, J. Han, D. Hua, J. Li, J. Zhong, X. Wang, Z. Zhao, T. Yao, S. Jiang, P. Xu, Z. Zhang, B. Song, *Angew. Chem., Int. Ed.*, 2024, e202419595.
7. Z. Li, S. Ji, C. Wang, H. Liu, L. Leng, L. Du, J. Gao, M. Qiao, J. H. Horton, Y. Wang, *Adv. Mater.*, 2023, **35**, 2300905
8. M. Xie, Y. Lu, X. Xiao, D. Wu, B. Shao, H. Nian, C. Wu, W. Wang, J. Gu, S. Han, M. Gu, Q. Xu, *Adv. Funct. Mater.*, 2024, **34**, 2414537
9. C. Zhang, N. Huang, Z. Zhai, L. Liu, B. Chen, B. Yang, X. Jiang, N. Yang, *Adv. Energy Mater.*, 2023, **13**, 2301749.
10. W.-X. Hong, W.-H. Wang, Y.-H. Chang, H. Pourzolfaghar, I. H. Tseng, Y.-Y. Li, *Nano Energy*, 2024, **121**, 109236.
11. M. Du, B. Chu, Q. Wang, C. Li, Y. Lu, Z. Zhang, X. Xiao, C. Q. Xu, M. Gu, J. Li, H. Pang, Q. Xu, *Adv. Mater.*, 2024, **36**, 2412978
12. Q. Zhou, W. Xue, X. Cui, P. Wang, S. Zuo, F. Mo, C. Li, G. Liu, S. Ouyang, S. Zhan, J. Chen, C. Wang, *Proc. Natl. Acad. Sci.*, 2024, **121**, e2404013121.
